# Supplementary material for: Larotinib in patients with advanced and previously treated esophageal squamous cell carcinoma with epidermal growth factor receptor overexpression or amplification: an open-label, multicenter phase 1b study
Source: PubMed Central journal article supplement (PMC8540164; doi:10.1186/s12876-021-01982-4), 2021-10-23
Supplement: 12876_2021_1982_MOESM3_ESM.pdf [file 12876_2021_1982_MOESM3_ESM.pdf]

**Additional file**

**Article title:** Larotinib in Patients with Advanced and Previously Treated Esophageal Squamous Cell Carcinoma with Epidermal Growth Factor Receptor Overexpression or Amplification: An Open-Label, Multicenter Phase 1b Study

**Journal name:** Cancer Chemotherapy and Pharmacology

**Author names:** Jianming Xu, Lianke Liu, Rongrui Liu, Chuanhua Zhao, Yuxian Bai, Yulong Zheng, Shu Zhang, Ning Li, Jianwei Yang, Qingxia Fan, Xiuwen Wang, Shan Zeng, Yingjun Zhang, Weihong Zhang, Yulei Zhuang, Ning Kang, Yingzhi Jiang, Hongmei Sun

Lianke Liu, Rongrui Liu and Chuanhua Zhao contributed equally to this work, and are considered as joint first authors.

**Corresponding authors:** Jianming Xu, [jmxu2003@yahoo.com](mailto:jmxu2003@yahoo.com)

### Additional file 3: Overall Response Assessed by Independent Radiology Review

Table S2 Confirmed overall response assessed by independent radiology review

| All patients          | 250 mg        | 300 mg            | 350 mg            | All               |
|-----------------------|---------------|-------------------|-------------------|-------------------|
|                       | n=2           | n=21              | n=49 <sup>a</sup> | n=72 <sup>a</sup> |
| CR, n(%)              | 0             | 0                 | 0                 | 0                 |
| PR, n(%)              | 0             | 2 ( 9.5)          | 8 (16.3)          | 10 (13.9)         |
| SD, n(%)              | 0             | 8 (38.1)          | 22 (44.9)         | 30 (41.7)         |
| PD, n(%)              | 2 (100)       | 9 (42.9)          | 15 (30.6)         | 26 (36.1)         |
| NE, n(%)              | 0             | 2 ( 9.5)          | 4 ( 8.2)          | 6 ( 8.3)          |
| <b>ORR, %(95% CI)</b> | 0 (0.0, 84.2) | 9.5 (1.2, 30.4)   | 16.3(7.3, 29.7)   | 13.9 (6.9, 24.1)  |
| <b>DCR, %(95% CI)</b> | 0 (0.0, 84.2) | 47.6 (25.7, 70.2) | 61.2 (46.2, 74.8) | 55.6 (43.4, 67.3) |

Abbreviations: CR, complete response; PR, partial response; SD, stable disease  $\geq$  6 weeks; PD, progressive disease; NE, not evaluable; ORR, objective response rate; DCR, disease control rate, including CR, PR and SD; CI, confidence interval.

<sup>a</sup> The image of one patient in 350 mg group was evaluated by investigator but not by independent radiology review due to image quality.
